# Supplementary material for: Treatment of Basal Cell Carcinoma with Electrochemotherapy: Insights from the InspECT Registry (2008–2019)
Source: MDPI journal article supplement (doi:10.3390/curroncol29080423), 2022-07-28
Supplement: s1 [file s1]

Article

# Treatment of Basal Cell Carcinoma with Electrochemotherapy: Insights from the InspECT Registry (2008–2019)

Giulia Bertino, Tobian Muir, Joy Odili, Ales Groselj, Roberto Marconato, Pietro Curatolo, Erika Kis, Camilla Kjaer Lonkvist, James Clover, Pietro Quaglino, Christian Kunte, Romina Spina, Veronica Seccia, Francesca de Terlizzi, Luca Giovanni Campana and the InspECT BCC Working Group

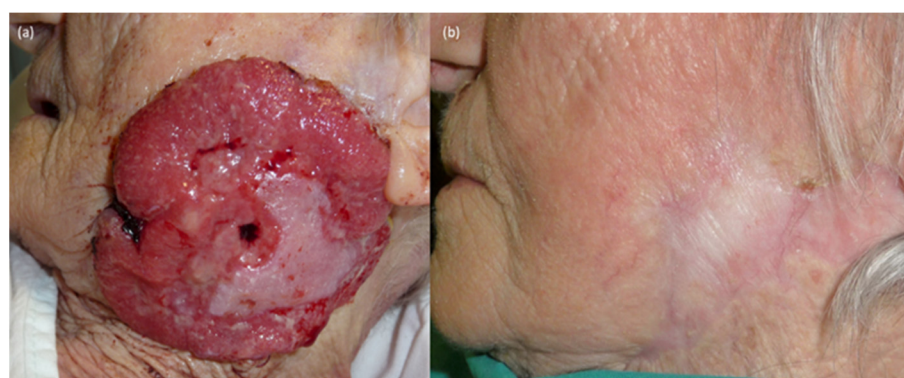

**Figure S1.** Primary locally advanced BCC in a 96-year-old patient treated with ECT under general anaesthesia. (a) Baseline presentation. (b) Complete response at 11 months, following a single course of treatment.

**Table S1.** Predictors of objective response.

| Characteristics                                   | Univariate analysis |            |       | Multivariate analysis |            |              |
|---------------------------------------------------|---------------------|------------|-------|-----------------------|------------|--------------|
|                                                   | RR                  | C.I. 95%   | P     | RR                    | C.I. 95%   | P            |
| Anatomical location<br>(head & neck vs other)     | 5.92                | 1.77-19.79 | 0.004 | 4.96                  | 1.22-20.06 | <b>0.025</b> |
| BLM administration<br>(i.v. vs i.t.)              | 0.89                | 0.28-2.88  | 0.850 |                       |            |              |
| Previous irradiation<br>(yes vs no)               | 0.09                | 0.02-0.38  | 0.001 | 0.20                  | 0.03-1.13  | 0.069        |
| Lymphedema (yes vs no)                            | 3077                | 0-+∞       | 0.967 |                       |            |              |
| Tumour size<br>(≤ 30 mm vs > 30 mm)               | 6.14                | 1.83-20.60 | 0.003 | 4.77                  | 1.20-18.98 | <b>0.027</b> |
| Coverage of deep tumour margin<br>(yes vs no)     | 3.50                | 1.00-12.22 | 0.049 | 0.95                  | 0.12-7.43  | 0.959        |
| Coverage of lateral tumour margins<br>(yes vs no) | 4.30                | 1.22-15.13 | 0.023 | 2.60                  | 0.31-21.63 | 0.376        |
| Presentation<br>(recurrent vs primary)            | 0.54                | 0.14-2.08  | 0.371 |                       |            |              |
| Previous treatments                               | 0.12                | 0.03-0.57  | 0.007 | 0.17                  | 0.03-0.85  | <b>0.032</b> |

(yes vs no)

**Table S2.** Patient characteristics according to development or not of local recurrence.

| Characteristic              | No recurrence<br>( <i>n</i> = 272 patients<br>with 534 tumours) | Local recurrence<br>( <i>n</i> = 28 patients<br>with 35 tumours) | <i>P</i> |
|-----------------------------|-----------------------------------------------------------------|------------------------------------------------------------------|----------|
| Sex                         |                                                                 |                                                                  |          |
| Males                       | 172 (63%)                                                       | 16 (57%)                                                         | 0.6676   |
| Females                     | 100 (37%)                                                       | 12 (43%)                                                         |          |
| Age (years)                 | 76 (64-96)                                                      | 72 (23-93)                                                       | 0.1277   |
| No tumours / patient        | 1 (1-7)                                                         | 1 (1-7)                                                          |          |
| Presentation                |                                                                 |                                                                  |          |
| Primary naïve               | 164 (60%)                                                       | 17 (61%)                                                         | 0.6862   |
| Primary persistent          | 64 (24%)                                                        | 8 (28%)                                                          |          |
| Recurrent                   | 44 (16%)                                                        | 3 (11%)                                                          |          |
| Tumour size (cm)            | 13 (5-350)                                                      | 12 (5-40)                                                        |          |
| ≤3                          | 483 (90%)                                                       | 34 (97%)                                                         | 0.2400   |
| >3                          | 51 (50%)                                                        | 1 (3%)                                                           | 0.3037   |
| Tumour anatomic location    |                                                                 |                                                                  |          |
| Head & Neck                 | 422 (79%)                                                       | 31 (89%)                                                         | 0.3863   |
| Trunk                       | 65 (12%)                                                        | 2 (5.5%)                                                         |          |
| Limbs                       | 47 (9%)                                                         | 2 (5.5%)                                                         |          |
| Previous treatment          |                                                                 |                                                                  |          |
| None                        | 164 (60%)                                                       | 17 (61%)                                                         | 0.9977   |
| Surgical excision           | 97 (36%)                                                        | 10 (36%)                                                         |          |
| Other <sup>a</sup>          | 9 (3%)                                                          | 1 (3%)                                                           |          |
| Unknown                     | 2 (1%)                                                          | 0                                                                |          |
| Anesthesia                  |                                                                 |                                                                  |          |
| Local                       | 178 (65%)                                                       | 22 (79%)                                                         | 0.2329   |
| Local + sedation            | 94 (35%)                                                        | 6 (21%)                                                          |          |
| Route of BLM administration |                                                                 |                                                                  |          |
| Intratumoural               | 125 (46%)                                                       | 8 (29%)                                                          | 0.1179   |
| Intravenous                 | 147 (54%)                                                       | 20 (71%)                                                         |          |
| Electrode geometry          |                                                                 |                                                                  |          |
| Row needle                  | 337 (63%)                                                       | 22 (63%)                                                         | 0.1128   |
| Hexagonal needle            | 134 (25%)                                                       | 13 (37%)                                                         |          |
| Plate                       | 40 (8%)                                                         | 0                                                                |          |
| Combination                 | 23 (4%)                                                         | 0                                                                |          |

**Table S3.** Clinical studies on ECT in unselected cancer populations, including patients with BCC

| Author                        | Year | Study                      | No pts | No of tumours | BCC subtype | BCC presentation                        | T size (mm)                | Drug | Route             | CR (%)            | Re-ECT (%)      | F-up (mos) | Recurrence                      |
|-------------------------------|------|----------------------------|--------|---------------|-------------|-----------------------------------------|----------------------------|------|-------------------|-------------------|-----------------|------------|---------------------------------|
| Clover <sup>1</sup>           | 2020 | Registry                   | 298    | 567           | n.r.        | n.r.                                    | n.r.                       | BLM  | i.v./i.t.         | 71 <sup>a</sup>   | n.a.            | n.r.       | n.r.                            |
| De Giorgi <sup>2</sup>        | 2020 | Case series                | 4      | 4             | n.r.        | Primary: 3<br>Recurrent: 1              | 0.5-1                      | CDDP | i.t.              | 50                | 0               | 12         | no                              |
| Rotunno <sup>3</sup>          | 2018 | Case series                | 10     | n.r.          | n.r.        | Primary /<br>Recurrent                  | 10<br>(5-190) <sup>b</sup> | BLM  | i.v. <sup>c</sup> | 83 <sup>d</sup>   | 26 <sup>b</sup> | 5          | n.r. for histotype              |
| Montuori <sup>4</sup>         | 2016 | Case series                | 11     | 15            | n.r.        | n.r.                                    | n.r.                       | BLM  | i.v. /<br>i.t.    | 100               | 9 <sup>e</sup>  | 12         | no                              |
| Groselj <sup>5</sup>          | 2018 | Prospective cohort         | 12     | 17            | n.r.        | Primary /<br>recurrent                  | 21<br>(6-80)               | BLM  | i.v. <sup>f</sup> | 100               | n.r.            | n.r.       | n.r. for histotype              |
|                               |      | Retrospective case series  | 16     | 25            |             |                                         | 17<br>(4-50)               |      | i.v.              | 96                |                 |            |                                 |
| Bertino <sup>6</sup>          | 2016 | Observational multicentric | 34     | 34            | n.r.        | Primary: 20<br>Recurrent: 14            | 31/34<br>< 3 cm            | BLM  | i.v. /<br>i.t.    | 91                | 3               | 6          | 1-yr DFS 89%<br>(4 recurrences) |
| Campana <sup>7</sup>          | 2016 | Observational multicentric | 24     | n.r.          | n.r.        | Primary /<br>recurrent                  | 15<br>(10-30)              | BLM  | i.v. /<br>i.t.    | 67 <sup>d</sup>   | 24 <sup>b</sup> | 13.9       | n.r. for histotype              |
| Campana <sup>8</sup>          | 2014 | Retrospective case series  | 9      | 9             | n.r.        | primary /<br>recurrent                  | 35<br>(10-100)             | BLM  | i.v. /<br>i.t.    | 78 <sup>a,d</sup> | 39 <sup>b</sup> | 14         | 1-yr LPFS 86%                   |
| Rodriguez-Cuevas <sup>9</sup> | 2001 | Phase II                   | 9      | 9             | n.r.        | primary: 8<br>recurrent: 1 <sup>§</sup> | 16±4                       | BLM  | i.t.              | 78 <sup>a,d</sup> | 33              | 8.6        | no                              |

Note: BLM, bleomycin; CDDP, cisplatin; CR, clearance rate; i.t., intratumoural; i.v., intravenous; LDfs, local disease-free survival; LPFS, local progression-free survival; mos, months; n.e., not evaluable; n.r., not reported; SCC, squamous cell carcinoma. <sup>a</sup> per-tumour assessment; <sup>b</sup> also includes patients with other histotypes; <sup>c</sup> reduced BLM doses (13,500 / 10,000 / 7,500 IU/m<sup>2</sup>); <sup>d</sup> per-patient assessment; <sup>e</sup> one patient received a second ECT for a newly diagnosed BCC outside the previous treatment field; <sup>f</sup> reduced BLM dose (10,000 IU/m<sup>2</sup>); <sup>§</sup> after previous RT.

## References

1. Clover, A.J.P.; de Terlizzi, F.; Bertino, G.; Curatolo, P.; Odili, J.; Campana, L.G.; Kunte, C.; Muir, T.; Brizio, M.; Sersa, G. Electrochemotherapy in the treatment of cutaneous malignancy: Outcomes and subgroup analysis from the cumulative results from the pan-European International Network for Sharing Practice in Electrochemotherapy database for 2482 lesions in 987 patients (2008–2019). *Eur. J. Cancer* **2020**, *138*, 30–40. <https://doi.org/10.1016/j.ejca.2020.06.020>.

2. De Giorgi, V.; Scarfi, F.; Saqer, E.; Gori, A.; Tomassini, G.M.; Covarelli, P. The use of cisplatin electrochemotherapy in nonmelanoma skin cancers: A single-center study. *Dermatol. Ther.* **2020**, *33*, e13547.
3. Rotunno, R.; Campana, L.G.; Quaglino, P.; de Terlizzi, F.; Kunte, C.; Odili, J.; Gehl, J.; Ribero, S.; Liew, S.H.; Marconato, R.; et al. Electrochemotherapy of unresectable cutaneous tumours with reduced dosages of intravenous bleomycin: Analysis of 57 patients from the International Network for Sharing Practices of Electrochemotherapy registry. *J. Eur. Acad. Dermatol. Venereol.* **2018**, *32*, 1147–1154. <https://doi.org/10.1111/jdv.14708>.
4. Montuori, M.; Santurro, L.; Feliziani, A.; Ricciardi, E.; Gaudio, D.; Campione, E.; Bianchi, L.; Silvi, M.B.; Rossi, P. Electrochemotherapy for basocellular and squamocellular head and neck cancer: preliminary experience in Day Surgery Unit. *G. Ital. Dermatol. Venereol.* **2016**, *153*, 19–25.
5. Groselj, A.; Bosnjak, M.; Strojani, P.; Krzan, M.; Cemazar, M.; Sersa, G. 2018. Efficiency of electrochemotherapy with reduced bleomycin dose in the treatment of nonmelanoma head and neck skin cancer: Preliminary results. *Head Neck* **2018**, *40*, 120–125.
6. Bertino, G.; Sersa, G.; de Terlizzi, F.; Occhini, A.; Plaschke, C.C.; Groselj, A.; Langdon, C.; Grau, J.J.; McCaul, J.A.; Heuveling, D.; et al. European Research on Electrochemotherapy in Head and Neck Cancer (EURECA) project: Results of the treatment of skin cancer. *Eur. J. Cancer* **2016**, *63*, 41–52. <https://doi.org/10.1016/j.ejca.2016.05.001>.
7. Campana, L.G.; Testori, A.; Curatolo, P.; Quaglino, P.; Mocellin, S.; Framarini, M.; Borgognoni, L.; Ascierto, P.A.; Mozzillo, N.; Guida, M. Treatment efficacy with electrochemotherapy: A multi-institutional prospective observational study on 376 patients with superficial tumours. *Eur. J. Surg. Oncol.* **2016**, *42*, 1914–1923. <https://doi.org/10.1016/j.ejso.2016.06.399>.
8. Campana, L.G.; Mali, B.; Sersa, G.; Valpione, S.; Giorgi, C.A.; Strojani, P.; Miklavcic, D.; Rossi, C.R. Electrochemotherapy in nonmelanoma head and neck cancers: A retrospective analysis of the treated cases. *Br. J. Oral Maxillofac. Surg.* **2014**, *52*, 957–964. <https://doi.org/10.1016/j.bjoms.2014.08.004>.
9. Rodríguez-Cuevas, S.; Barroso-Bravo, S.; Almanza-Estrada, J.; Cristóbal-Martínez, L.; González-Rodríguez, E.; Electrochemotherapy in primary and metastatic skin tumors: phase II trial using intralesional bleomycin. *Arch. Med. Res.* **2001**, *32*, 273–276.
